# Supplementary material
Source: publisher figshare collection journal article supplement (https://acs.figshare.com/ndownloader/files/3775183)
Supplement: Supplementary file 1 [file 3775183]

# Supporting Information

## Ultradispersed Palladium Nanoparticles in Three-Dimensional Dendritic Mesoporous Silica Nanospheres: Toward Highly Active and Stable Heterogeneous Catalysts

*Dengke Shen,<sup>†</sup> Lei Chen,<sup>†</sup> Jianping Yang,<sup>†‡</sup> Renyuan Zhang,<sup>†</sup> Yong Wei,<sup>†</sup>  
Xiaomin Li,<sup>†</sup> Wei Li,<sup>†</sup> Zhenkun Sun,<sup>†</sup> Hongwei Zhu,<sup>†</sup> Aboubakr M. Abdullah,<sup>§</sup>  
Abdullah Al-Enizi,<sup>‡</sup> Ahmed A. Elzatahry,<sup>†</sup> Fan Zhang,<sup>†</sup> Dongyuan Zhao<sup>\*†</sup>*

<sup>†</sup>Department of Chemistry, Shanghai Key Laboratory of Molecular Catalysis and Innovative Materials, State Key Laboratory of Molecular Engineering of Polymers and Laboratory of Advanced Materials, Fudan University, Shanghai 200433, P. R. China. E-mail: dyzhao@fudan.edu.cn.

<sup>‡</sup>College of Environmental Science and Engineering, State Key Laboratory of Pollution Control and Resources Reuse, Tongji University, Shanghai 200092, P. R. China.

<sup>§</sup>Center for Advanced Materials, Qatar University, Doha 2713, Qatar

<sup>‡</sup>Department of Chemistry, College of Science, King Saud University, Riyadh 11451, Saudi Arabia

<sup>†</sup>Materials Science and Technology Program, College of Arts and Sciences, Qatar University, P.O. Box 2713, Doha, Qatar

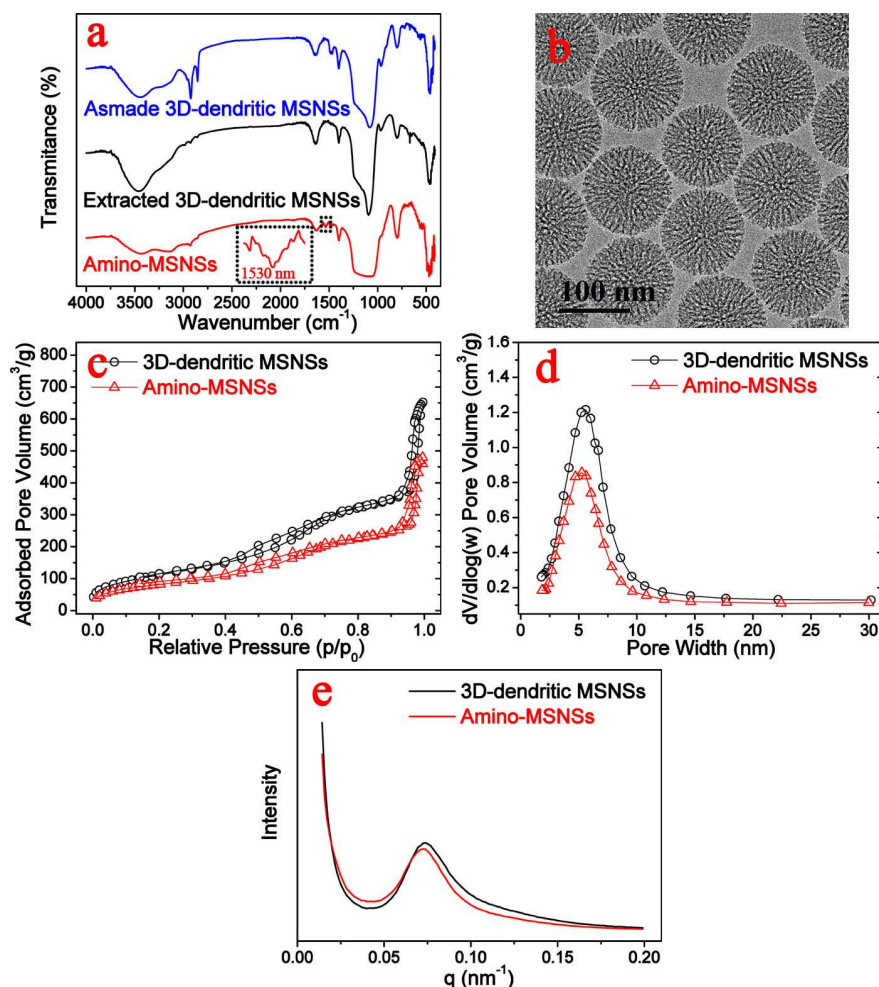

Figure S1. FTIR spectra (a) of the asmade 3D-dendritic MSNs, the extracted 3D-dendritic MSNs (black) and the amino-MSNs (red); TEM image of the extracted 3D-dendritic MSNs (b); nitrogen adsorption-desorption isotherms (c) and pore size distribution (d) of the extracted 3D-dendritic MSNs (black) and the amino-MSNs (red); SAXS patterns (e) of the extracted 3D-dendritic MSNs (black) and the amino-MSNs (red).

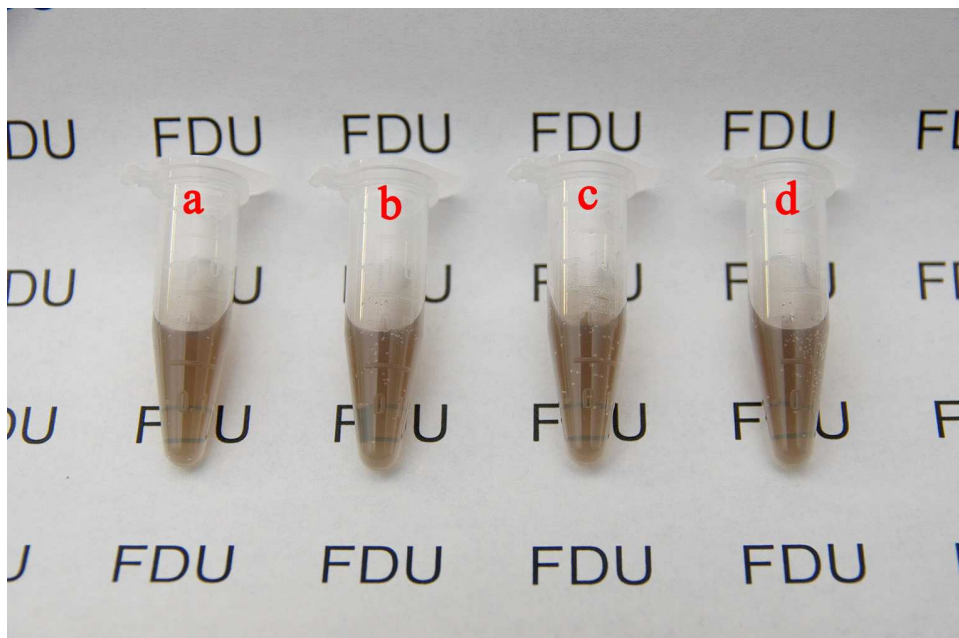

Figure S2. The optical photograph of the aqueous solution of the Pd-MSNSs with the concentration of 4 mg/ml: (a) Pd-MSNSs-10, (b) Pd-MSNSs-30, (c) Pd-MSNSs-50, and (d) Pd-MSNSs-70.

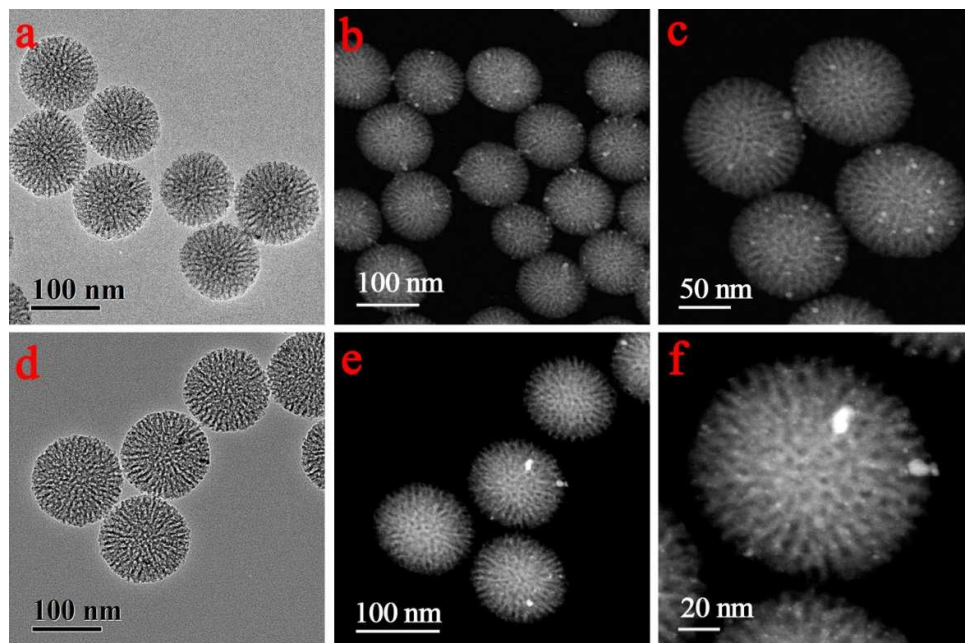

Figure S3. TEM images (a, d) and HAADF-STEM images (b, c, e, f) of Pd-MSNSs-10 (a, b, c) and Pd-MSNSs-70 (d, e, f) prepared via the *in-situ* growth approach.

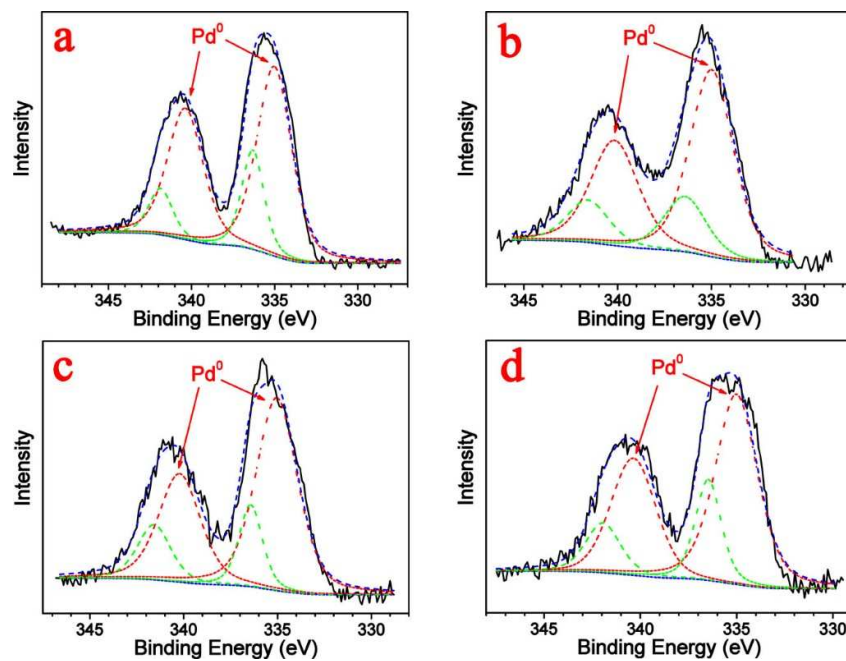

Figure S4. XPS spectra of Pd-MSNSs-10 (a); Pd-MSNSs-30 (b); Pd-MSNSs-50 (c) and Pd-MSNSs-70 (d).

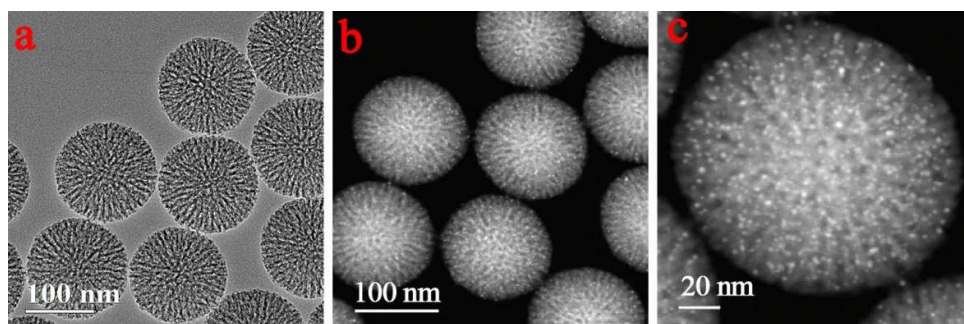

Figure S5. TEM image (a) and HAADF-STEM images (b, c) of the sample 3D-dendritic MSNSs immobilized with Au nanoparticles *via* the *in-situ* growth approach.
